# Supplementary material for: Cell Surface Proteomics Analysis Indicates a Neural Lineage Bias of Rat Bone Marrow Mesenchymal Stromal Cells
Source: Hindawi journal article supplement (doi:10.1155/2014/479269), 2014-01-01
Supplement: f1 [file 479269.f1.pdf]

Supplemental Table-1: Primers used in this study

| Primers for rat |                            |                            |
|-----------------|----------------------------|----------------------------|
| Primers         | Forward(5'-3')             | Reverse(5'-3')             |
| Primers for rat |                            |                            |
| Erlin-2         | CAGTTCCTGCAGCGTCCATACACTT  | AACTCATAGTTCCTGCGGATTGCC   |
| Gabbr1          | TTCACCAGCCTTGTCAAACCGA     | TGGTCTGTTGGATGGTAGCGATCT   |
| Ptprk           | TGCGGACGCCAAAGACTTTGAA     | GGCCTCGGAAGTAATGGTAGCAAATG |
| P2rx2           | TGGACATGCAAGGCAATGGGAT     | ACTTGGGGTAGTGGATGCTGTTCT   |
| Tpbp            | TGCATCTTTCCGCAACCTGACA     | GTAGCAGTCACAAACCCAGGGATT   |
| Atp6v1e1        | GCAAGACTCAAAGTCCTCAGAGCAAG | GCACAATCATTGAGGTTCCAACAGC  |
| Fxyd5           | AAGACCCAGCAACTGACCGAAA     | AGAAGGGGCTGTTCTCATTGGGAT   |
| Aplnr           | TTTGCCACTGTGGGCCACTTAT     | ACAATGGCCAGGTATCGGTCAAAG   |
| Rpn2            | TCCCAGAATCGCTATCACGTACCA   | AAGCCACGGACTTAGCATGTTCCA   |
| Atp1a1          | ATGAGCATCAACGCAGAGGATGTC   | TGGGGTTCTGATTCACCAGTGAGT   |
| Rel11           | TGGTGTCTCATCTGCCACTTACT    | TATAGTGGACAATCTGCCCAACGGT  |
| RT1-EC2         | ATTACCGAGTGAGCCTGAGGAA     | AAGTCTGCCACAGCCCATGTTT     |
| Alcam           | ATGGCATCTAAAGGGTCCCCTTCT   | GTTCTGAGGTACATCCAGTCTGCAAG |
| Cr11            | CTGTTCTTGTGCGCATCTACTTTGGG | CCACACTGAGTTTACTTCGCAGGT   |
| Atp1b1          | ATTGTGGCAGTATGCCCAGTGAAC   | TCCCCTCTTTGTAGCCGTAGGATT   |
| Fat2            | AATCTCGGAGGGCAATGGATTGG    | AGGGAATCTACTTCAGCTCCTGAACC |
| Nckap1          | GTGCTTGAGTTGCCTTCTCAGT     | TTCCGAGCTTGTTTGCCATCT      |
| Vdac1           | CCACATATGCTGATCTTGGCAAGTCC | GGTTTCCAGACTGCCGTTCACTTT   |
| Got2            | CCATGTTGAAATGGGACCTCCAGA   | GGAGCACGTAAGGCTTTCCGTTAT   |
| Srprb           | CAGGGGTAACAGCCTGACTTTGATTG | CTGTCGATGAGGACCTGGTACAGAA  |
| Atp5a1          | CGGCTTAAAGGGTATGTCCCTGAAC  | ACCCTTCCCATCAATGGCATTTC    |
| Cnp             | GAGATCTTACGGCAAGGCCTTCAA   | ACAACCTGCAGCTCCTGCTCATT    |
| Cpd             | ATCACAGCATCTGCTCGAGGGTAT   | TTAGAAGTTGGGTCGCTGGTGTATC  |
| Gabbr1          | CACCCGAAGCATTTCACATGAC     | AAAGCCAAGGCCAGATAGCATCA    |
| Ncam1           | ATACACCATCTTCCCCATCCATCGAC | GTGACAATCCCTTCCATGTTGGCT   |
| L1cam           | GCACCATCTGGCTGTGAAGACTAA   | TGAAGCAGAGGATGAGCAGGATGA   |
| Cdh10           | CCATCCATCTGCGAGTTCTTGAATCC | GCGGTAATCCACTTCGGCATTT     |
| Cdh23           | CGTGATCACAGTCAAAGGCTTGGT   | TGAAGTCAAAGCGTGGGCTGTT     |
| Cdh17           | CAGCATATTTCCACCTGGTCTCTCA  | TCTCTGCCAAGGGCAAACGTAAAC   |
| Cdh1            | TAAAGACCAGGTGACCACGTTGGA   | CCAAGGATGGCGGGAACCTGTAAAT  |
| Itga5           | TCAACCTTAGCTTCTGCCTCAACG   | CATTCTGGATAAGCAGGGTCTGGGTA |
| RHAMM           | AACAGTTGAAGCTTGCCCTGGATG   | TTCCGCAGTTGACTTCGTTTCCTC   |
| Itgb1           | CGATAGGTCCAACGGCTTAATCTGTG | CTTGGAACCTGGGATCTGTGCACT   |
| Marco           | AGTCCCAGGTCTTGTAGGCAGAAA   | CGATCCGGACAACCAGGTTGAAAT   |
| Msr1            | TCCTAAAGGTGATCAGGGACCAGTTG | GATATTCCTGCACGCCCCTTTTCT   |
| Tlr10           | TGCTGGTTATCCTGGTTCTGGGTT   | GACAGAATCATGTGCAGCGTAGGAGA |
| Tlr12           | ACCCTTAGCCTGCTAGATACCCAA   | GACAGTGTCCAATGCTTCAAGCCT   |
| Trpm2           | CTGAGATCACCATCTCCCTGATCCA  | GCAGAATGGCAACATCCACATCCT   |
| Trpm8           | GCTAATGAGTATGAGACCCGAGCAGT | CAATGAAATGCTGGTCCGTAGCCT   |
| Ryk             | TTAACCTGCTAGTGCCAGTGAGA    | TACTTTGCCGGTACACGAAAGCTC   |

|                   |                             |                            |
|-------------------|-----------------------------|----------------------------|
| Fshr              | TGACATCCATACCAAGAGCCAGTACC  | AGCTGCACCTTGCATTCCAGTT     |
| Efnb1             | CCAACTACATGGGCCTGGAATTCA    | TGGTAGTCAACTGCTCAGGCGTTA   |
| Celsr3            | CGTACGAGTGACATAACTGTGCT     | ACCAAACCATTGGCATCCTTGTCC   |
| Grm7              | GAGATGACCTGTGAGCATTGTCCCTA  | CCAACATTGCCAGGAAGACAGGAA   |
| Grik4             | AACTGAACCGGAGCCAGGAAATTG    | CGAAACCCATTCTGGTGAAGTGT    |
| Chrm5             | TTCCCAGTGTCCAAAGACCCTTCA    | ACAGAAGGTGGAAACCAGGACCAT   |
| Npr1              | ATATGCGGGATGTGCAGAAATGAGC   | TGTCATTGGTGAGCGAGTACCGAA   |
| Pdgfrb            | GTGAATGACCACGGCGATGAGAAA    | CAAGGTACGTTGTCCTTGAACCA    |
| Pdgfb             | CGGTGCAGGTGAGAAAGATCGAAAT   | AGTTTGAGGTGTCTTGGCTCGATG   |
| Nrp1              | GTTGGGCATGGTGTCTGGACTTAT    | CAGGTCCACTTGGAGCCATTTCAT   |
| Sema3b            | AACATCAGCAAGCGAGCCAAGA      | GTTGTAGGCATGCAACAGCTTCAC   |
| Sfrp4             | TTGCGATGAGCTGCCTGTCTATG     | CGATCAGGGCTCAGATGTTTACAGTC |
| Fzd1              | CTCATGAACAAGTTCGGCTTCCAGT   | TGCCTTTGTCGGAAGTGTTCCTG    |
| Igflr1            | AAAGTCCGTTCCCATCCTTGTTCC    | GATGTCTTCCCTCTGTTTCCACTTCC |
| Igf2r             | AATTGGGAAGCAGTGGATGGCA      | ACCTTCAGGACAGTTCTTGGCCTTTC |
| Il1rl1            | GAGTTTGCCTATGAGCAGGAGATCG   | CCACTTGATGGTCCCCTGCATTTT   |
| Il23a             | TTTGCAAAGGATCCGCCAAGGT      | ATCTGTTGAGTCTCCAGTGGT      |
| Fgf9              | CGCAGTCACGGACTTGGATCATT     | ACCAGGCCCCACTGCTATACTGATAA |
| Bmp2              | GACCAGACTATTGGACACCAGGTT    | CTTGGTGCAAAGACCTGCTAATCCTC |
| Fstl4             | AGTGCTGACCTGTGCTATTTCGT     | GGTGTAGTTGCCCATGTGGATTGT   |
| Mstn              | TCCTCAGTAAACTCCGCCTGGAAA    | CCGTGGTAGCGTGATAATCGTCAT   |
| Erbp2             | GCTCTGCTACCAGGACATGGTTTT    | GGTACAGATGGTGCCAGTCAAGAT   |
| Stoml2            | GTGAGTCCCTGAACGCCAACATT     | CCTGCATCTGCATGGACTCTTTGA   |
| Sept3             | GGGAGTGACAAGGAGTACCAAGTGAA  | TTGAGCCTCTTGGCCCTGTAAGTT   |
| Homer3            | CAAGCATGCACCTTACCGTGTCTTA   | TGAAGGTCATGTTGGGAGTGACTGT  |
| CD31              | TGTCTACTCAGTCATGGCCTTGGT    | CGGCCTGGGAAACAGTTCTGTTAT   |
| CD45              | GCTCAAACCTTCTGGCCTTCAGCTT   | GTGAGGCATCAGCGTGGATGAAAA   |
| CD44              | CCCTGAGAAAAGGGGTTTGAAACATGC | TGTGTCATAGTGGGAGGTGTTGGA   |
| Nes               | AGGTGGGTGCTCTAAAGGTT        | AGGATCTCACCTCCCTTGCT       |
| Nefm              | AGCCAAGGAATCACCCAAGGAAGA    | TCCAGGCTCACCTTTACCGACTTA   |
| Tubb3             | TGCATCGACAATGAAGCCCTCTAC    | CATTGAGCTGACCAGGAATCGAA    |
| Map2              | GCAGAAATTGCCTTCCTCATTCGC    | TCCTTCCATGTCTTGGGGATCCTT   |
| Tau               | ACAGACCATGGAGCAGAAATCGTG    | ACAAACCCTGCTTGGCCAAAGA     |
| Actb              | GTGACGTTGACATCCGTAAAGA      | GCCGGACTCATCGTACTCC        |
| Primers for human |                             |                            |
| Nes               | CTGCTACCCTTGAGACACCTG       | GGGCTCTGATCTCTGCATCTAC     |
| Map2              | CTCAGCACCGCTAACAGAGG        | CATTGGCGCTTCGGACAAG        |
| Tau               | CCAAGTGTGGCTCATTAGGCA       | CCAATCTTCGACTGGACTCTGT     |
| ACTB              | CATGTACGTTGCTATCCAGGC       | CTCCTTAATGTCACGCACGAT      |

Supplemental Table-2: Cell surface proteins identified in this study

| NCBI<br>Protein Gi | Protein Name                                                      |
|--------------------|-------------------------------------------------------------------|
| 158138551          | alpha-2-macroglobulin                                             |
| 333033773          | Alpha-fetoprotein                                                 |
| 6978501            | Annexin A1                                                        |
| 6978509            | Adenomatous polyposis coli protein                                |
| 6978527            | Aquaporin-1                                                       |
| 6978539            | Beta-arrestin-2                                                   |
| 6978543            | Sodium/potassium-transporting ATPase subunit alpha-1              |
| 6978547            | Sodium/potassium-transporting ATPase subunit alpha-3              |
| 148747253          | Sodium/potassium-transporting ATPase subunit beta-1               |
| 6978553            | Sodium/potassium-transporting ATPase subunit beta-3               |
| 6978555            | Sarcoplasmic/endoplasmic reticulum calcium ATPase 3               |
| 158138532          | Copper-transporting ATPase 2                                      |
| 6978595            | Calcium/calmodulin-dependent protein kinase type II subunit delta |
| 6978647            | Secretogranin-1                                                   |
| 6978667            | Chymase                                                           |
| 6978695            | Ceruloplasmin                                                     |
| 6978697            | Carboxypeptidase B                                                |
| 6978699            | Carboxypeptidase D                                                |
| 6978773            | Dipeptidyl peptidase 4                                            |
| 6978785            | Proheparin-binding EGF-like growth factor                         |
| 6978797            | Pro-epidermal growth factor                                       |
| 158186649          | Alpha-enolase                                                     |
| 6978857            | Follistatin                                                       |
| 6978867            | Gamma-aminobutyric acid receptor subunit beta-1                   |
| 6980972            | Aspartate aminotransferase, mitochondrial                         |
| 6980990            | Gastrin-releasing peptide receptor                                |
| 6981068            | Intercellular adhesion molecule 1                                 |
| 6981108            | Integrin beta-4                                                   |
| 6981110            | Inositol 1,4,5-trisphosphate receptor type 3                      |
| 6981142            | Laminin subunit beta-2                                            |
| 6981164            | Hormone-sensitive lipase                                          |
| 6981214            | Matrilysin                                                        |
| 6981280            | Atrial natriuretic peptide receptor 1                             |
| 6981354            | Multidrug resistance protein 3                                    |
| 6981420            | Anionic trypsin-1                                                 |
| 6981468            | Peripherin-2                                                      |
| 6981590            | Interleukin-1 receptor-like 1                                     |
| 148368981          | ATP-binding cassette sub-family C member 8                        |
| 7549773            | Kininogen-1                                                       |
| 8392842            | Lysosomal acid phosphatase                                        |
| 8392852            | Adenylate cyclase type 8                                          |

|           |                                                                          |
|-----------|--------------------------------------------------------------------------|
| 291327518 | Vasopressin-neurophysin 2-copeptin                                       |
| 8392990   | Bone morphogenetic protein 2                                             |
| 8393030   | Voltage-dependent L-type calcium channel subunit alpha-1D                |
| 8393087   | Cell adhesion molecule-related/down-regulated by oncogenes               |
| 8393123   | Muscarinic acetylcholine receptor M5                                     |
| 8393138   | Chloride channel protein 2                                               |
| 158517923 | Atrophin-1                                                               |
| 8393399   | Gamma-aminobutyric acid receptor subunit rho-1                           |
| 8393487   | Metabotropic glutamate receptor 1                                        |
| 8393576   | 3-keto-steroid reductase                                                 |
| 158303324 | Integrin beta-1 CD29                                                     |
| 8393649   | ATP-sensitive inward rectifier potassium channel 1                       |
| 8393820   | Neural cell adhesion molecule L1                                         |
| 8393929   | cGMP-inhibited 3',5'-cyclic phosphodiesterase B                          |
| 8394121   | Peroxisome biogenesis factor 2                                           |
| 8394142   | Ras-related protein Rab-27A                                              |
| 126723574 | Adenylate cyclase type 4                                                 |
| 9506403   | ADP-ribosylation factor-like protein 4A                                  |
| 9506421   | Beta-secretase 1                                                         |
| 9506595   | Fibroblast growth factor 18                                              |
| 186972114 | Fibronectin                                                              |
| 9506883   | Membrane cofactor protein                                                |
| 9506901   | Multiple PDZ domain protein                                              |
| 9506903   | Beta-microseminoprotein                                                  |
| 9506907   | Growth/differentiation factor 8                                          |
| 9845234   | Annexin A2                                                               |
| 9845261   | Galectin-1                                                               |
| 9910120   | Disintegrin and metalloproteinase domain-containing protein 2            |
| 9910340   | Arf-GAP with dual PH domain-containing protein 2                         |
| 10048483  | Protein piccolo                                                          |
| 10242377  | Glutamate receptor, ionotropic kainate 4                                 |
| 158186718 | Frizzled-1                                                               |
| 11072106  | Nucleobindin-2                                                           |
| 11177892  | Potassium channel subfamily T member 1                                   |
| 11276093  | Vascular endothelial growth factor receptor 1                            |
| 11559947  | Peripheral plasma membrane protein CASK                                  |
| 11596861  | Guanylate cyclase activator 2B                                           |
| 11612653  | FXYP domain-containing ion transport regulator 5                         |
| 12018314  | Phosphorylase b kinase regulatory subunit alpha, skeletal muscle isoform |
| 12083643  | Exocyst complex component 7                                              |
| 158636004 | Flotillin-1                                                              |
| 12621132  | Protocadherin Fat 2                                                      |
| 12711694  | Cytoplasmic dynein 2 heavy chain 1                                       |
| 13027426  | PRA1 family protein 3                                                    |

|           |                                                                  |
|-----------|------------------------------------------------------------------|
| 13162326  | Bile acyl-CoA synthetase                                         |
| 13242253  | Bifunctional heparan sulfate N-deacetylase/N-sulfotransferase 1  |
| 13540622  | Glypican-1                                                       |
| 13540640  | Solute carrier organic anion transporter family member 1A3       |
| 13540689  | Moesin                                                           |
| 13540699  | Neuropilin-2                                                     |
| 256221435 | Plectin                                                          |
| 13569846  | Alpha-parvin                                                     |
| 13591902  | Alpha-actinin-1                                                  |
| 13591914  | Aminopeptidase N                                                 |
| 13591932  | Chondroitin sulfate proteoglycan 4                               |
| 13591955  | Guanine nucleotide-binding protein G(i) subunit alpha-2          |
| 13591963  | Metabotropic glutamate receptor 7                                |
| 146262019 | 72 kDa type IV collagenase                                       |
| 13591995  | Matrix metalloproteinase-14                                      |
| 13592045  | Rhodopsin kinase                                                 |
| 13592047  | Aminopeptidase B                                                 |
| 148747375 | Phosphatidate cytidyltransferase 1                               |
| 13786140  | Cadherin EGF LAG seven-pass G-type receptor 3                    |
| 13786164  | Cadherin-1                                                       |
| 13786192  | Apelin receptor                                                  |
| 13928706  | Neural cell adhesion molecule 1                                  |
| 162287173 | Carnitine O-palmitoyltransferase 1, liver isoform                |
| 13928766  | Ephrin type-A receptor 3                                         |
| 13928822  | ATP-sensitive inward rectifier potassium channel 10              |
| 13929058  | CD166 antigen                                                    |
| 13929062  | Vitamin K-dependent gamma-carboxylase                            |
| 13929072  | Bile salt export pump                                            |
| 13929110  | V-type proton ATPase subunit S1                                  |
| 13929136  | Deformed epidermal autoregulatory factor 1 homolog               |
| 13994179  | Sodium/potassium/calcium exchanger 2                             |
| 13994184  | Mannosyl-oligosaccharide glucosidase                             |
| 14091742  | Contactin-associated protein 1                                   |
| 14091750  | Estradiol 17-beta-dehydrogenase 12                               |
| 16258817  | Copper-transporting ATPase 1                                     |
| 16758006  | Homer protein homolog 2                                          |
| 16758046  | C-terminal-binding protein 2                                     |
| 16758144  | Melanoma-associated antigen D1                                   |
| 16758152  | C-X-C chemokine receptor type 3                                  |
| 16758224  | Neurabin-1                                                       |
| 158186631 | Cyclic nucleotide-gated cation channel alpha-4                   |
| 16758274  | Peroxiredoxin-4                                                  |
| 16758300  | Ectonucleotide pyrophosphatase/phosphodiesterase family member 1 |
| 16758310  | Low-density lipoprotein receptor-related protein 3               |

|           |                                                                              |
|-----------|------------------------------------------------------------------------------|
| 16758316  | Phosphatidylinositol 5-phosphate 4-kinase type-2 beta                        |
| 16758342  | Membrane-bound transcription factor site-1 protease                          |
| 16758372  | Dipeptidase 1                                                                |
| 16758422  | Membrane-associated guanylate kinase, WW and PDZ domain-containing protein 2 |
| 16758534  | Embigin                                                                      |
| 16758540  | CLIP-associating protein 2                                                   |
| 168823431 | Neurexin-3-alpha                                                             |
| 16758684  | Retinal guanylyl cyclase 2                                                   |
| 16758694  | Atrial natriuretic peptide receptor 2                                        |
| 16758746  | Contactin-4                                                                  |
| 16758758  | Protein ERGIC-53                                                             |
| 16758818  | Potassium voltage-gated channel subfamily H member 6                         |
| 16758824  | Serine/threonine-protein kinase MARK1                                        |
| 16758872  | Cadherin-17                                                                  |
| 164663795 | Potassium voltage-gated channel subfamily B member 2                         |
| 16758938  | AP-2 complex subunit mu                                                      |
| 16758964  | Homer protein homolog 3                                                      |
| 16924000  | Leucine-rich repeat-containing protein 7                                     |
| 17105342  | Nasal embryonic luteinizing hormone-releasing hormone factor                 |
| 17105346  | Phospholipid scramblase 1                                                    |
| 17865345  | Cadherin-23                                                                  |
| 17978453  | Amyloid beta A4 precursor protein-binding family B member 1                  |
| 18034783  | Canalicular multispecific organic anion transporter 2                        |
| 18158449  | Coatamer subunit beta                                                        |
| 18266702  | Vesicle transport protein SEC20                                              |
| 18426832  | Interleukin-23 subunit alpha                                                 |
| 18543357  | Sodium-coupled neutral amino acid transporter 4                              |
| 18959256  | Interleukin-24                                                               |
| 18959272  | Potassium voltage-gated channel subfamily KQT member 2                       |
| 19424160  | Potassium-transporting ATPase alpha chain 2                                  |
| 19424304  | Neuronal acetylcholine receptor subunit beta-3                               |
| 19424324  | Potassium voltage-gated channel subfamily H member 5                         |
| 189083698 | Caveolin-1                                                                   |
| 158138568 | Serum albumin                                                                |
| 19705437  | Ephrin type-A receptor 7                                                     |
| 19705483  | Calsyntenin-2                                                                |
| 19923689  | Disks large-associated protein                                               |
| 19923703  | CD44 antigen                                                                 |
| 19924085  | Protocadherin Fat 3                                                          |
| 20302049  | NADH-cytochrome b5 reductase 3                                               |
| 20302083  | General receptor for phosphoinositides 1-associated scaffold protein         |
| 20302091  | Phospholipase B1, membrane-associated                                        |
| 20302101  | Odorant-binding protein                                                      |

|           |                                                                                  |
|-----------|----------------------------------------------------------------------------------|
| 20376816  | Glutamate [NMDA] receptor subunit 3B                                             |
| 158631200 | Casein kinase I isoform delta                                                    |
| 20806147  | CD48 antigen                                                                     |
| 20806161  | Probable G-protein coupled receptor 116                                          |
| 21245116  | Death domain-containing membrane protein NRADD                                   |
| 21955128  | Leucine-rich glioma-inactivated protein 1                                        |
| 23618893  | Leucine zipper putative tumor suppressor 1                                       |
| 25140983  | ERC protein 2                                                                    |
| 25282419  | Calnexin                                                                         |
| 25453392  | Alpha-1B-glycoprotein                                                            |
| 25742766  | Fibroblast growth factor 9                                                       |
| 26023947  | Neuropilin-1                                                                     |
| 27465533  | Unconventional myosin-Ie                                                         |
| 27545388  | ATP-binding cassette sub-family A member 5                                       |
| 27753972  | Frizzled-5                                                                       |
| 27819651  | Nicastrin                                                                        |
| 28212250  | Voltage-dependent calcium channel subunit alpha-2/delta-2                        |
| 28461145  | Agrin                                                                            |
| 28570188  | Chloride intracellular channel protein 6                                         |
| 29293825  | Interleukin-1 receptor accessory protein-like 1                                  |
| 158186621 | Complement C4                                                                    |
| 29789269  | Glutamate receptor 1                                                             |
| 29789275  | Platelet-derived growth factor receptor beta                                     |
| 30017437  | Neuronal membrane glycoprotein M6-a                                              |
| 163659913 | Glutamate receptor, ionotropic kainate 3                                         |
| 31077142  | Kv channel-interacting protein 4                                                 |
| 31126963  | Submandibular gland secretory Glx-rich protein CA                                |
| 31542029  | Multidrug resistance-associated protein 1                                        |
| 31542335  | Voltage-dependent calcium channel subunit alpha-2/delta-1                        |
| 139948535 | UDP-N-acetylglucosamine--peptide N-acetylglucosaminyltransferase 110 kDa subunit |
| 37693510  | Bone marrow stromal antigen 2                                                    |
| 38454276  | Immunoglobulin superfamily member 10                                             |
| 39930507  | Potassium channel subfamily K member 15                                          |
| 40254721  | Amphoterin-induced protein 2                                                     |
| 40254761  | Tyrosine-protein kinase Fgr                                                      |
| 40254779  | Ephrin-B1                                                                        |
| 40385885  | Follicle-stimulating hormone receptor                                            |
| 40538742  | ATP synthase subunit alpha, mitochondrial                                        |
| 40538874  | Nexilin                                                                          |
| 40786487  | Protein GPR108                                                                   |
| 40786493  | Pannexin-3                                                                       |
| 41053837  | Glutathione peroxidase 3                                                         |
| 41054820  | Chordin-like protein 1                                                           |

|           |                                                                               |
|-----------|-------------------------------------------------------------------------------|
| 148747472 | Mitofusin-2                                                                   |
| 189083700 | Caveolin-1                                                                    |
| 41529837  | Junction plakoglobin                                                          |
| 42476116  | Fibulin-5                                                                     |
| 42538984  | Xin actin-binding repeat-containing protein 2                                 |
| 46048609  | Catenin beta-1                                                                |
| 46485389  | Kin of IRRE-like protein 1                                                    |
| 47059500  | Neuron-specific protein family member 1                                       |
| 47087081  | Abhydrolase domain-containing protein 16A                                     |
| 50511316  | Jouberin                                                                      |
| 50657390  | Beta-secretase 2                                                              |
| 51036661  | Type-1A angiotensin II receptor                                               |
| 51854227  | Gelsolin                                                                      |
| 51948494  | Integrin beta-6                                                               |
| 52138521  | Ezrin                                                                         |
| 52345439  | Neurexophilin-4                                                               |
| 53759105  | Complement component receptor 1-like protein                                  |
| 54020664  | Decorin                                                                       |
| 54312088  | Plasma membrane calcium-transporting ATPase 4                                 |
| 55741439  | Oncostatin-M                                                                  |
| 55741681  | Integral membrane protein 2B                                                  |
| 56090309  | Myelin protein zero-like protein 1                                            |
| 56090341  | Uncharacterized protein C1orf56 homolog                                       |
| 56090608  | Protein CLN8                                                                  |
| 56605670  | Leucine-rich repeat-containing protein 59                                     |
| 56605720  | Leucine-rich repeat-containing protein 59                                     |
| 56605746  | Transmembrane protein 97                                                      |
| 56676360  | Dihydroorotate dehydrogenase (quinone), mitochondrial                         |
| 56797757  | Fibrinogen alpha chain                                                        |
| 57164113  | Sterol-4-alpha-carboxylate 3-dehydrogenase, decarboxylating                   |
| 57526957  | Aspartoacylase-2                                                              |
| 57528269  | Abhydrolase domain-containing protein 14A                                     |
| 57977323  | 2',3'-cyclic-nucleotide 3'-phosphodiesterase                                  |
| 58865696  | Uncharacterized aarF domain-containing protein kinase 4                       |
| 58865778  | Dolichyl-diphosphooligosaccharide--protein glycosyltransferase 48 kDa subunit |
| 58865948  | Cyclic AMP-responsive element-binding protein 3-like protein 2                |
| 60097910  | Probable G-protein coupled receptor 19                                        |
| 161783809 | Apolipoprotein B-100                                                          |
| 61556826  | NEDD4 family-interacting protein 1                                            |
| 61557025  | ER lumen protein retaining receptor 2                                         |
| 61557037  | NADH-cytochrome b5 reductase 1                                                |
| 61889129  | 3 beta-hydroxysteroid dehydrogenase/Delta 5-->4-isomerase type 4              |
| 62078583  | Phospholipase B-like 1                                                        |
| 62078625  | Ankyrin repeat domain-containing protein 46                                   |



|           |                                                                        |
|-----------|------------------------------------------------------------------------|
| 62078677  | Coiled-coil domain-containing protein 47                               |
| 62078695  | Malectin                                                               |
| 62078741  | Coagulation factor XII                                                 |
| 348605241 | Kazrin                                                                 |
| 62078929  | Coiled-coil domain-containing protein 51                               |
| 62078985  | Nucleolar complex protein 4 homolog                                    |
| 62079009  | Transmembrane protein 192                                              |
| 62079201  | Transmembrane protein 55B                                              |
| 62122956  | GRAM domain-containing protein 1A                                      |
| 62945342  | Lymphocyte transmembrane adapter 1                                     |
| 66730471  | Transmembrane protein ENSP00000340100 homolog                          |
| 67010011  | C-type mannose receptor 2                                              |
| 67078456  | Leucine-rich repeat-containing protein 8A                              |
| 68163381  | Protein FAM26E                                                         |
| 68163431  | Leucine-rich repeat-containing protein 33                              |
| 71043602  | G-protein coupled receptor 4                                           |
| 71043856  | B-cell linker protein                                                  |
| 71361635  | Protein OSCP1                                                          |
| 71795652  | Solute carrier family 25 member 38                                     |
| 71896592  | Insulin-like growth factor-binding protein complex acid labile subunit |
| 75832132  | Extended synaptotagmin-1                                               |
| 75992946  | Brevican core protein                                                  |
| 76257394  | Serine/threonine-protein kinase MRCK beta                              |
| 76496479  | Carcinoembryonic antigen-related cell adhesion molecule 1              |
| 76559925  | Calumenin                                                              |
| 76563950  | Calpain 11                                                             |
| 77176454  | Cell surface glycoprotein MUC18                                        |
| 77404238  | Gamma-aminobutyric acid type B receptor subunit 1                      |
| 77861906  | Presqualene diphosphate phosphatase                                    |
| 77917608  | Protein FAM134B                                                        |
| 78097112  | ATPase family AAA domain-containing protein 1                          |
| 78365244  | Alpha-adducin                                                          |
| 81295329  | Leucine-rich repeat-containing protein 8C                              |
| 83816939  | Alpha-1-inhibitor 3                                                    |
| 84370262  | Fibronectin type III domain-containing protein 1                       |
| 86515432  | Cytospin-A                                                             |
| 88853561  | Gephyrin                                                               |
| 88853835  | Formin-binding protein 1-like                                          |
| 6981324   | Protein disulfide-isomerase                                            |
| 6981332   | Plasminogen activator inhibitor 1                                      |
| 6981402   | cGMP-dependent protein kinase 2                                        |
| 6981430   | Prostaglandin-H2 D-isomerase                                           |
| 6981432   | Prostaglandin E2 receptor EP1 subtype                                  |
| 6981480   | Proto-oncogene tyrosine-protein kinase ROS                             |

|           |                                                                          |
|-----------|--------------------------------------------------------------------------|
| 6981486   | Dolichyl-diphosphooligosaccharide--protein glycosyltransferase subunit 1 |
| 6981494   | Class I histocompatibility antigen, Non-RT1.A alpha-1 chain              |
| 6981574   | SPARC                                                                    |
| 347800746 | Serine protease inhibitor A3K                                            |
| 6981626   | Protachykinin-1                                                          |
| 6981654   | Thy-1 membrane glycoprotein                                              |
| 6981660   | Lamina-associated polypeptide 2, isoform beta                            |
| 6981686   | Tubby protein homolog                                                    |
| 148747528 | Protein-tyrosine kinase 2-beta                                           |
| 8393450   | Golgi apparatus protein 1                                                |
| 8393944   | Proenkephalin-A                                                          |
| 8394307   | Neutral and basic amino acid transport protein rBAT                      |
| 8394364   | Translocon-associated protein subunit delta                              |
| 8394496   | Tyrosine-protein kinase receptor TYRO3                                   |
| 9506833   | Small conductance calcium-activated potassium channel protein 2          |
| 9506891   | 4F2 cell-surface antigen heavy chain                                     |
| 9507085   | Neuronal-specific septin-3                                               |
| 9507127   | SRC kinase signaling inhibitor 1                                         |
| 9507169   | Synaptotagmin-3                                                          |
| 9507235   | 2-hydroxyacylsphingosine 1-beta-galactosyltransferase                    |
| 11024652  | Transforming growth factor beta-1                                        |
| 11067413  | Adenylate cyclase type 10                                                |
| 11177880  | Vesicle-associated membrane protein-associated protein B                 |
| 11968080  | Protein kinase C zeta type                                               |
| 12083665  | Serine/threonine-protein kinase TAO2                                     |
| 12408318  | Protein unc-13 homolog A                                                 |
| 12408320  | Protein unc-13 homolog B                                                 |
| 124107592 | Unconventional myosin-Ic                                                 |
| 12831221  | Vesicle transport through interaction with t-SNAREs homolog 1A           |
| 13540638  | Endoplasmic reticulum aminopeptidase 1                                   |
| 13591864  | Neurosecretory protein VGF                                               |
| 13592148  | Ras-related protein Rab-11A                                              |
| 13786160  | Solute carrier family 22 member 8                                        |
| 13786200  | Voltage-dependent anion-selective channel protein 1                      |
| 13928974  | Dolichyl-diphosphooligosaccharide--protein glycosyltransferase subunit 2 |
| 13929006  | Ras-related protein Rab-2A                                               |
| 13929012  | Serine protease HTRA1                                                    |
| 13929122  | Sperm-associated antigen 4 protein                                       |
| 13929144  | Trophoblast glycoprotein                                                 |
| 13994177  | Clathrin coat assembly protein AP180                                     |
| 14091758  | Synaptojanin-2                                                           |
| 14861868  | Receptor-type tyrosine-protein phosphatase V                             |
| 15011857  | Selenoprotein P                                                          |
| 16306470  | Regulating synaptic membrane exocytosis protein 1                        |

|           |                                                              |
|-----------|--------------------------------------------------------------|
| 16758080  | Collagen alpha-2(I) chain                                    |
| 16758312  | Secreted frizzled-related protein 4                          |
| 16758368  | Ras-related protein Rab-14                                   |
| 16758600  | Regulator of G-protein signaling 14                          |
| 16758640  | Phosphatidylinositol phosphatase SAC1                        |
| 16758812  | B(0,+)-type amino acid transporter 1                         |
| 16758874  | Ras-related protein Rab-28                                   |
| 17939356  | Synaptotagmin-like protein 4                                 |
| 18034781  | GTP-binding protein Rab-3D                                   |
| 18093098  | P2X purinoceptor 2                                           |
| 18543347  | Polypeptide N-acetylgalactosaminyltransferase 10             |
| 18677747  | Taste receptor type 1 member 3                               |
| 18959222  | Sodium channel protein type 9 subunit alpha                  |
| 254675174 | Urocortin-2                                                  |
| 19424330  | Mitochondrial 2-oxodicarboxylate carrier                     |
| 19705557  | Pancreatic secretory granule membrane major glycoprotein GP2 |
| 20127390  | RING finger protein 112                                      |
| 399124780 | Phosphate carrier protein, mitochondrial                     |
| 21326477  | Receptor-interacting serine/threonine-protein kinase 3       |
| 21717663  | GTP-binding protein Rhes                                     |
| 307746876 | Alpha-1-macroglobulin                                        |
| 23097356  | Anion exchange protein 4                                     |
| 27465561  | Sphingosine-1-phosphate lyase 1                              |
| 154146247 | Trimeric intracellular cation channel type A                 |
| 158711704 | Collagen alpha-1(I) chain                                    |
| 157786694 | Polymerase I and transcript release factor                   |
| 28212216  | Trace amine-associated receptor 8a                           |
| 260166629 | Serine/threonine-protein kinase WNK4                         |
| 28212260  | Afadin- and alpha-actinin-binding protein                    |
| 257796229 | Ras GTPase-activating protein SynGAP                         |
| 32189350  | ADP/ATP translocase 2                                        |
| 32189355  | ADP/ATP translocase 1                                        |
| 32563565  | Serine protease inhibitor A3L                                |
| 33414515  | PX domain-containing protein kinase-like protein             |
| 158186720 | Solute carrier family 12 member 3                            |
| 158749620 | Microtubule-associated protein 1B                            |
| 157824216 | Ras-related protein R-Ras                                    |
| 189163506 | DnaJ homolog subfamily C member 10                           |
| 158138559 | Glia-derived nexin                                           |
| 157823984 | Erlin-2                                                      |
| 38454238  | Ras-related protein Rab-15                                   |
| 40018584  | Protrudin                                                    |
| 41235797  | SH3 and multiple ankyrin repeat domains protein 2            |
| 47058988  | Mitochondrial import receptor subunit TOM70                  |

|           |                                                                   |
|-----------|-------------------------------------------------------------------|
| 47059002  | Electrogenic sodium bicarbonate cotransporter 4                   |
| 51871603  | Suppressor of tumorigenicity 7 protein                            |
| 51921383  | SH3 and multiple ankyrin repeat domains protein 2                 |
| 51948448  | Ras-related protein Rab-21                                        |
| 52138628  | Ras-related protein Rap-1b                                        |
| 52851375  | Transient receptor potential cation channel subfamily M member 8  |
| 54114993  | Ras-related protein Rap-1A                                        |
| 56090245  | T-complex protein 11 homolog                                      |
| 56090369  | Thioredoxin-related transmembrane protein 2                       |
| 56090383  | Transmembrane protein 43                                          |
| 56711254  | Collagen alpha-1(III) chain                                       |
| 120474989 | Keratin, type II cytoskeletal 1                                   |
| 57528337  | Transmembrane emp24 domain-containing protein 9                   |
| 58219524  | Transmembrane protein 17                                          |
| 162135934 | Protein-tyrosine sulfotransferase 1                               |
| 58866008  | Transmembrane channel-like protein 5                              |
| 60223059  | Ribonuclease-like protein 10                                      |
| 61676217  | Signal recognition particle receptor subunit beta                 |
| 61889071  | Ras-related protein Rab-10                                        |
| 62079075  | Ventricular zone-expressed PH domain-containing protein homolog 1 |
| 110624761 | Protein YIPF5                                                     |
| 187960160 | Serine/threonine-protein kinase BRSK1                             |
| 209977101 | Transient receptor potential cation channel subfamily M member 4  |
| 46240860  | Deleted in malignant brain tumors 1 protein                       |
| 157821375 | Phosphatidylserine synthase 2                                     |
| 124248495 | Chitinase domain-containing protein 1                             |
| 209870097 | NACHT, LRR and PYD domains-containing protein 6                   |
| 157822043 | Plasminogen receptor (KT)                                         |
| 157821237 | secreted frizzled-related protein 5 precursor                     |
| 300798518 | FCH domain only protein 2                                         |
| 195973006 | Pikachurin                                                        |
| 157819267 | Oligosaccharyltransferase complex subunit OSTC                    |
| 157787099 | Neurogenic locus notch homolog protein 1                          |
| 189303567 | Patatin-like phospholipase domain-containing protein 7            |
| 158081781 | Niban-like protein 1                                              |
| 282154817 | secretory phospholipase A2 receptor precursor                     |
| 158138549 | Nck-associated protein 1                                          |
| 306482632 | BPI fold-containing family B member 4                             |
| 291045290 | Probable N-acetyltransferase CML2                                 |
| 392347640 | von Willebrand factor                                             |
| 281485586 | Mitogen-activated protein kinase kinase kinase 7                  |
| 293359269 | Transmembrane protein 245                                         |
| 121949752 | Delta(24)-sterol reductase                                        |
| 155369285 | HEAT repeat-containing protein 8                                  |

|           |                                                                                                  |
|-----------|--------------------------------------------------------------------------------------------------|
| 347300280 | Calsyntenin-1                                                                                    |
| 158081747 | Platelet-derived growth factor subunit B                                                         |
| 117647204 | T-cell surface glycoprotein CD3 gamma chain                                                      |
| 158186672 | E3 ubiquitin-protein ligase NEDD4                                                                |
| 392350152 | Disintegrin and metalloproteinase domain-containing protein 10                                   |
| 392350222 | Collagen alpha-1(XII) chain                                                                      |
| 392349911 | Amyloid-like protein 2                                                                           |
| 268607712 | Sushi, nidogen and EGF-like domain-containing protein 1                                          |
| 158186685 | Ras-related protein Rab-12                                                                       |
| 293351536 | Sterol regulatory element-binding protein 1                                                      |
| 281182792 | Serine/threonine-protein kinase 10                                                               |
| 158187531 | Noggin                                                                                           |
| 281306775 | Lactase-phlorizin hydrolase                                                                      |
| 293352958 | PREDICTED: GPI ethanolamine phosphate transferase 2 isoform 3                                    |
| 281306793 | Ephrin type-A receptor 5                                                                         |
| 158187548 | Merlin                                                                                           |
| 155369293 | Adipocyte enhancer-binding protein 1                                                             |
| 157822133 | Vinculin                                                                                         |
| 201066363 | Lysyl oxidase homolog 2                                                                          |
| 157819677 | Sarcolemmal membrane-associated protein                                                          |
| 109503020 | Nischarin                                                                                        |
| 281182586 | sema domain, immunoglobulin domain (Ig), short basic domain, secreted, (semaphorin) 3G precursor |
| 157819005 | Ectonucleotide pyrophosphatase/phosphodiesterase family member 6                                 |
| 125630382 | Microtubule-associated tumor suppressor 1 homolog                                                |
| 157823771 | Hippocampus abundant transcript-like protein 1                                                   |
| 157823803 | Docking protein 3                                                                                |
| 157786758 | Epididymal secretory glutathione peroxidase                                                      |
| 281332166 | Probable G-protein coupled receptor 158                                                          |
| 209954628 | Pro-neuregulin-2, membrane-bound isoform                                                         |
| 155369271 | cAMP-dependent protein kinase catalytic subunit alpha                                            |
| 258679494 | Butyrophilin-like protein 2                                                                      |
| 209954854 | Graves disease carrier protein                                                                   |
| 253970435 | Guanine nucleotide-binding protein G(s) subunit alpha isoforms short                             |
| 70608161  | Receptor expression-enhancing protein 4                                                          |
| 71795631  | Inactive rhomboid protein 1                                                                      |
| 74271849  | Sodium-dependent neutral amino acid transporter SLC6A17                                          |
| 77020289  | Receptor tyrosine-protein kinase erbB-2                                                          |
| 77404421  | 3-oxo-5-alpha-steroid 4-dehydrogenase 1                                                          |
| 77695930  | Syntaxin-12                                                                                      |
| 77993298  | Translocon-associated protein subunit alpha                                                      |
| 398650622 | Sodium/calcium exchanger 1                                                                       |
| 84781733  | E3 ubiquitin-protein ligase UBR4                                                                 |
| 8393073   | Leukocyte antigen CD37                                                                           |

|           |                                                                          |
|-----------|--------------------------------------------------------------------------|
| 157819501 | cleft lip and palate associated transmembrane protein 1                  |
| 187937124 | transmembrane protein 126B                                               |
| 157787012 | SLAM family member 9 precursor                                           |
| 29293815  | serologically defined colon cancer antigen 8 homolog                     |
| 29789369  | receptor-type tyrosine-protein phosphatase gamma                         |
| 148747388 | thyrotropin releasing hormone receptor 2                                 |
| 148747388 | thyrotropin releasing hormone receptor 2                                 |
| 157818549 | transmembrane emp24 domain-containing protein 6 precursor                |
| 157818549 | transmembrane emp24 domain-containing protein 6 precursor                |
| 197313797 | mitochondrial carrier homolog 1                                          |
| 157822673 | heparan sulfate glucosamine 3-O-sulfotransferase 5                       |
| 157823653 | Clavesin-2                                                               |
| 157816949 | nodal modulator 1 precursor                                              |
| 197313795 | metaxin-1                                                                |
| 121583768 | ras-related protein Rab-5B                                               |
| 157823877 | cytoskeleton-associated protein 4                                        |
| 157818077 | EMILIN-1                                                                 |
| 157822511 | T-cell surface glycoprotein CD3 epsilon chain precursor                  |
| 121583784 | semaphorin-3B precursor                                                  |
| 387157894 | dystroglycan precursor                                                   |
| 194473626 | cytochrome c-1                                                           |
| 157817887 | cholesterol 24-hydroxylase                                               |
| 157816925 | pinin                                                                    |
| 274327782 | desert hedgehog precursor                                                |
| 347300461 | alkB, alkylation repair homolog 5                                        |
| 157823385 | SLIT and NTRK-like protein 6 precursor                                   |
| 157786724 | charged multivesicular body protein 6                                    |
| 114326232 | glycerol-3-phosphate acyltransferase 6                                   |
| 312922379 | tenascin-N precursor                                                     |
| 34881169  | PREDICTED: sphingolipid delta(4)-desaturase DES1                         |
| 158508580 | translocase of inner mitochondrial membrane 17 homolog B                 |
| 157823972 | PRA1 family protein 2                                                    |
| 38454230  | V-type proton ATPase subunit E 1                                         |
| 47087124  | collagen alpha-2(XI) chain precursor                                     |
| 50657392  | SPARC-related modular calcium-binding protein 1 precursor                |
| 51854233  | protocadherin-7 precursor                                                |
| 56961650  | kallistatin precursor                                                    |
| 58585238  | transient receptor potential cation channel subfamily M member 2         |
| 58866030  | XK-related protein 5                                                     |
| 61097926  | tyrosine-protein kinase RYK precursor                                    |
| 61557085  | spectrin beta chain, brain 1                                             |
| 61557316  | CMP-N-acetylneuraminate-beta-galactosamide-alpha-2,3-sialyltransferase 1 |
| 62078999  | TRAF3-interacting JNK-activating modulator                               |
| 157823407 | ralBP1-associated Eps domain-containing protein 1                        |

|           |                                                                              |
|-----------|------------------------------------------------------------------------------|
| 197387067 | IGF-like family receptor 1                                                   |
| 112984482 | suprabasin isoform 2 precursor                                               |
| 290563809 | dermokine precursor                                                          |
| 157819397 | B-cell receptor CD22 precursor                                               |
| 291084648 | netrin-5 precursor                                                           |
| 157822391 | otogelin precursor                                                           |
| 157823439 | tight junction protein ZO-1                                                  |
| 157820063 | alpha-mannosidase 2x                                                         |
| 210032529 | ras GTPase-activating-like protein IQGAP1                                    |
| 157820747 | neuromedin-B precursor                                                       |
| 157820309 | zinc finger protein 592                                                      |
| 300797871 | signal peptidase complex subunit 2 homolog                                   |
| 157817478 | phosphatidylinositol-4-phosphate 3-kinase C2 domain-containing subunit alpha |
| 187937018 | inositol 1,4,5-triphosphate receptor-interacting protein-like 2              |
| 157821515 | type I inositol-1,4,5-trisphosphate 5-phosphatase                            |
| 157821347 | plakophilin-3                                                                |
| 157817531 | transmembrane protein 2                                                      |
| 300794610 | phosphoglucomutase-like protein 5                                            |
| 157823129 | E3 ubiquitin-protein ligase MARCH5                                           |
| 157818177 | cone cGMP-specific 3',5'-cyclic phosphodiesterase subunit alpha'             |
| 209364574 | heparanase-2 precursor                                                       |
| 157821237 | secreted frizzled-related protein 5 precursor                                |
| 157820241 | MARVEL domain-containing protein 1                                           |
| 157822261 | NADH dehydrogenase [ubiquinone] 1 beta subcomplex subunit 8, mitochondrial   |
| 157817716 | AP-3 complex subunit beta-1                                                  |
| 312836829 | A disintegrin and metalloproteinase with thrombospondin motifs 12 precursor  |
| 274323706 | cadherin-10 precursor                                                        |
| 300794741 | fibronectin type III domain-containing protein 3B                            |
| 350534782 | FRAS1-related extracellular matrix protein 2 precursor                       |
| 157823757 | periostin precursor                                                          |
| 157818917 | lipopolysaccharide-responsive and beige-like anchor protein                  |
| 157818737 | probable histone-lysine N-methyltransferase ASH1L                            |
| 300798730 | nuclear pore membrane glycoprotein 210-like                                  |
| 157819073 | AP-4 complex subunit beta-1                                                  |
| 158749598 | leucine-rich repeats and immunoglobulin-like domains protein 2 precursor     |
| 157819343 | fibronectin type III domain-containing protein 7 precursor                   |
| 189011598 | calcium-binding mitochondrial carrier protein SCaMC-1                        |
| 157823739 | hippocampus abundant gene transcript 1                                       |
| 166091462 | guanylate binding protein 5                                                  |
| 157818955 | dolichyldiphosphatase 1                                                      |
| 157822303 | protein GPR107 precursor                                                     |
| 282154817 | secretory phospholipase A2 receptor precursor                                |
| 109468286 | integrin alpha-6 precursor                                                   |
| 157820047 | catenin delta-1                                                              |

|           |                                                                              |
|-----------|------------------------------------------------------------------------------|
| 158819029 | mitochondrial carrier homolog 2                                              |
| 208973288 | phosphatidylinositol 3,4,5-trisphosphate-dependent Rac exchanger 1 protein   |
| 157822663 | ras-related protein Rab-22A                                                  |
| 300798041 | laminin subunit alpha-5 precursor                                            |
| 201023302 | semaphorin-3C precursor                                                      |
| 157820449 | krev interaction trapped protein 1                                           |
| 157822901 | protein phosphatase 1 regulatory subunit 3A                                  |
| 392347666 | PREDICTED: ovostatin homolog                                                 |
| 188595692 | regulator of G-protein signaling 20                                          |
| 157820551 | alpha-catulin                                                                |
| 293359401 | SH3-containing GRB2-like protein 3-interacting protein 1                     |
| 157787147 | TEK tyrosine kinase, endothelial                                             |
| 157822407 | microtubule-associated serine/threonine-protein kinase 2                     |
| 187960053 | ephrin type-B receptor 2 precursor                                           |
| 157818937 | von Willebrand factor A domain-containing protein 5B1                        |
| 157818937 | von Willebrand factor A domain-containing protein 5B1                        |
| 157822929 | ephrin type-A receptor 2 precursor                                           |
| 300796048 | arylacetamide deacetylase-like 3                                             |
| 300796087 | pleckstrin homology domain-containing family H member 2                      |
| 291167742 | putative polypeptide N-acetylgalactosaminyltransferase-like protein 1        |
| 281332208 | pecanex-like protein 1                                                       |
| 300796288 | SCY1-like protein 2                                                          |
| 330340424 | transmembrane and TPR repeat-containing protein 2 precursor                  |
| 194474018 | R-spondin-2 precursor                                                        |
| 294345428 | brain-specific angiogenesis inhibitor 1 precursor                            |
| 189011703 | ER lumen protein retaining receptor 3                                        |
| 157821883 | plexin-B2 precursor                                                          |
| 157824146 | integrin alpha-5                                                             |
| 157824172 | nck-associated protein 1-like                                                |
| 300795929 | beta-galactosidase-1-like protein 2                                          |
| 197927176 | dolichyl-diphosphooligosaccharide--protein glycosyltransferase subunit STT3A |
| 157823041 | integrin alpha-11 precursor                                                  |
| 124249068 | carbonic anhydrase 12 precursor                                              |
| 157823279 | cingulin-like protein 1                                                      |
| 157817390 | cell cycle progression protein 1                                             |
| 157819015 | collagen alpha-1(VII) chain precursor                                        |
| 157818047 | tyrosine-protein kinase-like 7                                               |
| 157822789 | multidrug resistance-associated protein 7                                    |
| 300796855 | partitioning defective 3 homolog B                                           |
| 157818183 | von Willebrand factor C domain-containing protein 2-like precursor           |
| 157817097 | 2-acylglycerol O-acyltransferase 1                                           |
| 274323760 | receptor-type tyrosine-protein phosphatase mu precursor                      |
| 312147379 | laminin subunit alpha-1 precursor                                            |
| 157818431 | periplakin                                                                   |



|           |                                                                                                         |
|-----------|---------------------------------------------------------------------------------------------------------|
| 157818689 | TBC1 domain family member 9B                                                                            |
| 157819627 | follistatin-related protein 4 precursor                                                                 |
| 300793998 | protein shisa-6 homolog precursor                                                                       |
| 157820169 | ubiquitin carboxyl-terminal hydrolase 32                                                                |
| 157786652 | vacuolar protein sorting-associated protein 53 homolog                                                  |
| 392351689 | PREDICTED: ATP-binding cassette sub-family A member 9                                                   |
| 157819479 | probable G-protein coupled receptor 128                                                                 |
| 157820883 | protein FAM3B                                                                                           |
| 300793816 | probable cation-transporting ATPase 13A5                                                                |
| 157786986 | solute carrier family 35 member F5                                                                      |
| 201023377 | SLIT-ROBO Rho GTPase-activating protein 2                                                               |
| 157786960 | phosphatidylinositol-4-phosphate 3-kinase C2 domain-containing subunit beta                             |
| 281371494 | laminin, gamma 2 precursor                                                                              |
| 300794137 | T-lymphocyte surface antigen Ly-9                                                                       |
| 300794158 | inactive phospholipase D5                                                                               |
| 281371337 | laminin, beta 3 precursor                                                                               |
| 310688889 | plexin-A2                                                                                               |
| 281427143 | protein Shroom3                                                                                         |
| 157819815 | trans-2,3-enoyl-CoA reductase-like                                                                      |
| 166157526 | RELT-like protein 1 precursor                                                                           |
| 281182916 | stromal interaction molecule 2 precursor                                                                |
| 201066369 | leucine-rich repeat LGI family member 2 precursor                                                       |
| 157822319 | limbin                                                                                                  |
| 198386353 | myosin-Ig                                                                                               |
| 157823349 | serine/threonine-protein kinase VRK2                                                                    |
| 157822363 | protocadherin-17 precursor                                                                              |
| 281182586 | sema domain, immunoglobulin domain (Ig), short basic domain, secreted, (semaphorin) 3G precursor        |
| 300794315 | leucine-rich repeat, immunoglobulin-like domain and transmembrane domain-containing protein 2 precursor |
| 157819823 | FCH domain only protein 1                                                                               |
| 157823299 | chondroitin sulfate N-acetylgalactosaminyltransferase 1                                                 |
| 300798600 | EF-hand domain-containing family member A2                                                              |
| 300794338 | macrophage scavenger receptor types I and II                                                            |
| 157819609 | tumor necrosis factor ligand superfamily member 13B                                                     |
| 157823803 | Docking protein 3                                                                                       |
| 300797015 | constitutive coactivator of PPAR-gamma-like protein 1                                                   |
| 157822513 | engulfment and cell motility protein 1                                                                  |
| 291190715 | integrin alpha-8                                                                                        |
| 281371353 | interleukin 17B precursor                                                                               |
| 157817201 | neuropilin and tolloid-like protein 1 precursor                                                         |
| 157153636 | kinesin-like protein KIFC3                                                                              |
| 300797038 | hedgehog-interacting protein precursor                                                                  |
| 157818225 | contactin-associated protein-like 4 precursor                                                           |

|           |                                                                                            |
|-----------|--------------------------------------------------------------------------------------------|
| 157821063 | tubby-related protein 1                                                                    |
| 157823944 | sushi domain-containing protein 2 precursor                                                |
| 157823691 | sparc/osteonectin, cwcw and kazal-like domains proteoglycan 2                              |
| 157821033 | A disintegrin and metalloproteinase with thrombospondin motifs 14                          |
| 224450992 | LIM and senescent cell antigen-like-containing domain protein 1                            |
| 157819029 | solute carrier family 35 member F1                                                         |
| 157819593 | G-protein coupled receptor 143                                                             |
| 157818513 | protein FAM123B                                                                            |
| 157818411 | probable G-protein coupled receptor 174                                                    |
| 157818305 | probable G-protein coupled receptor 101                                                    |
| 157820859 | sperm acrosome-associated protein 5 precursor                                              |
| 66730395  | tyrosine-protein kinase TXK                                                                |
| 67078500  | transmembrane protein 5                                                                    |
| 68341983  | Williams-Beuren syndrome chromosome region 17 homolog                                      |
| 68342011  | UDP-N-acetyl-alpha-D-galactosamine:polypeptide<br>N-acetylgalactosaminyltransferase-like 5 |
| 158631175 | receptor-type tyrosine-protein phosphatase kappa precursor                                 |
| 76443685  | surfeit 4                                                                                  |
| 78097106  | transmembrane protein 69                                                                   |
| 81158091  | protocadherin gamma-A9 precursor                                                           |
| 83415090  | ras-related protein Rab-2B                                                                 |
| 306922410 | splicing factor, arginine/serine-rich 7                                                    |
| 84781743  | probable palmitoyltransferase ZDHHC8                                                       |
